# Supplementary material
Source: PubMed Central journal article supplement (PMC6849378)
Supplement: NIHMS995009-supplement-Supplemental.pdf [file NIHMS995009-supplement-Supplemental.pdf]

**Title:** Heterogeneous Extracellular Dopamine Regulation in the Subregions of the Olfactory Tubercle

**Authors:** Jinwoo Park<sup>1,2,4\*</sup>, Ken T. Wakabayashi<sup>1,3</sup>, Caitlin Szalkowski<sup>1</sup>, Rohan V. Bhimani<sup>4</sup>

*<sup>1</sup>Department of Biotechnical and Clinical Laboratory Sciences, <sup>2</sup>Pharmacology and Toxicology, <sup>3</sup>Research Institute in Addictions, <sup>4</sup>Neuroscience Program, Jacobs School of Medicine and Biomedical Sciences, University at Buffalo, State University of New York, Buffalo, 14214, USA*

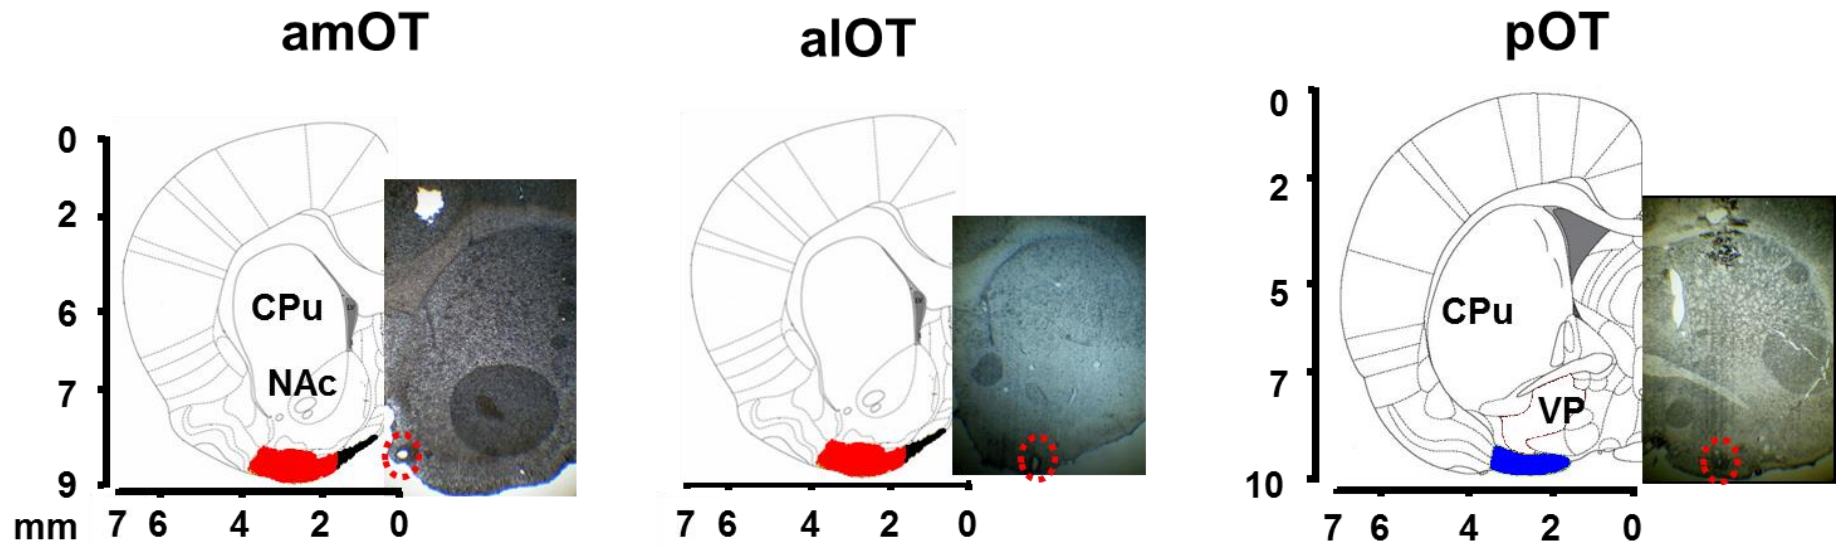

**Supplementary Figure 1.** Histological images represent electrolytic lesions (highlighted in red dotted circles) showing the position of the microelectrode, where  $[DA]_{\max}$  release in the OT were observed.

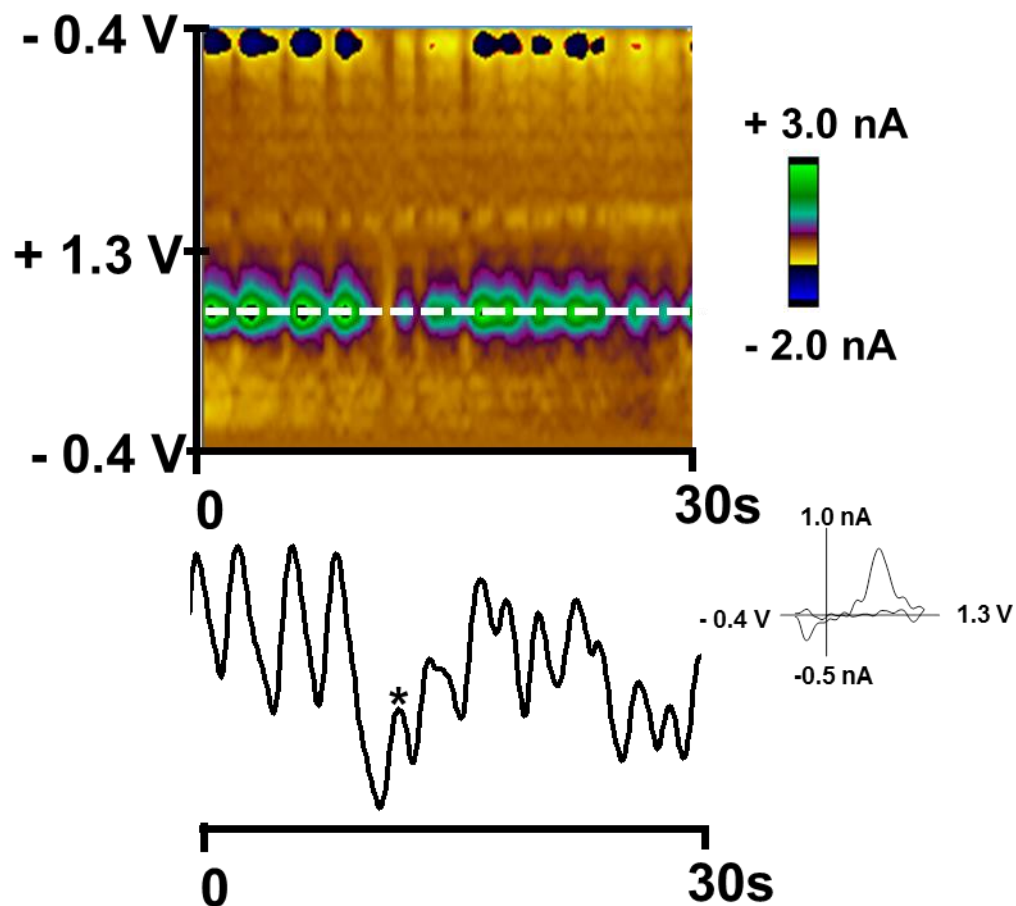

**Supplementary Figure 2.** Combined inhibition of DA uptake and D2 antagonism induces spontaneous DA transients in the nucleus accumbens (NAc). Color plot representations of background subtracted cyclic voltammograms collected over 30s after raclopride (RAC, 2 mg/kg, i.p.) and GBR 12909 (GBR, 15 mg/kg, i.p.) administration. DA concentration changes were seen in the color plot at the potential for DA oxidation ( $\sim 0.6 - 0.7$  V, dashed white line). The time course of the DA concentration transients is shown below the color plot. A cyclic voltammogram is shown as insets recorded at the time indicated by the asterisk (\*).
